# Supplementary material for: Fe3+ in a tetrahedral position determined the electrocatalytic properties in FeMn2O4
Source: Royal Society of Chemistry journal article supplement (doi:10.1039/d2ra04552d), 2022-01-01
Supplement: d2ra04552d1.pdf [file d2ra04552d1.pdf]

## Supporting Information

### Fe<sup>3+</sup> in Tetrahedral Position Determined Electrocatalytic Properties in FeMn<sub>2</sub>O<sub>4</sub>

Caiyun Qi, Qun Liu, Yucan Dong, Guoqiang Zhang, Xingdong Jiang\*, and Daqiang Gao\*

Key Laboratory for Magnetism and Magnetic Materials of MOE, Key Laboratory of Special Function Materials and Structure Design of MOE, Lanzhou University, Lanzhou 730000, People's Republic of China.

\*Corresponding author. E-mail: [jiangxd@lzu.edu.cn](mailto:jiangxd@lzu.edu.cn), [gaodq@lzu.edu.cn](mailto:gaodq@lzu.edu.cn)

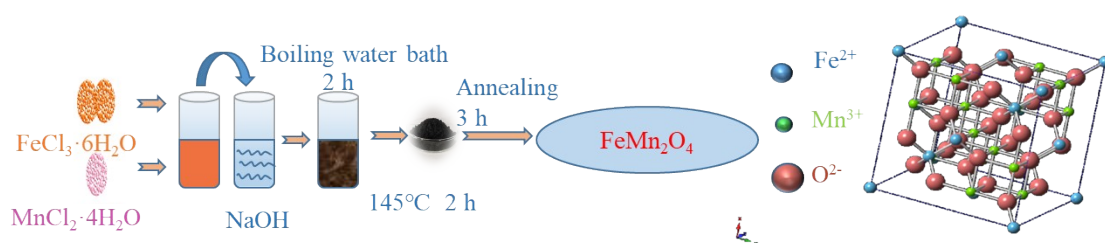

Fig. S1 Schematic illustration of FeMn<sub>2</sub>O<sub>4</sub>.

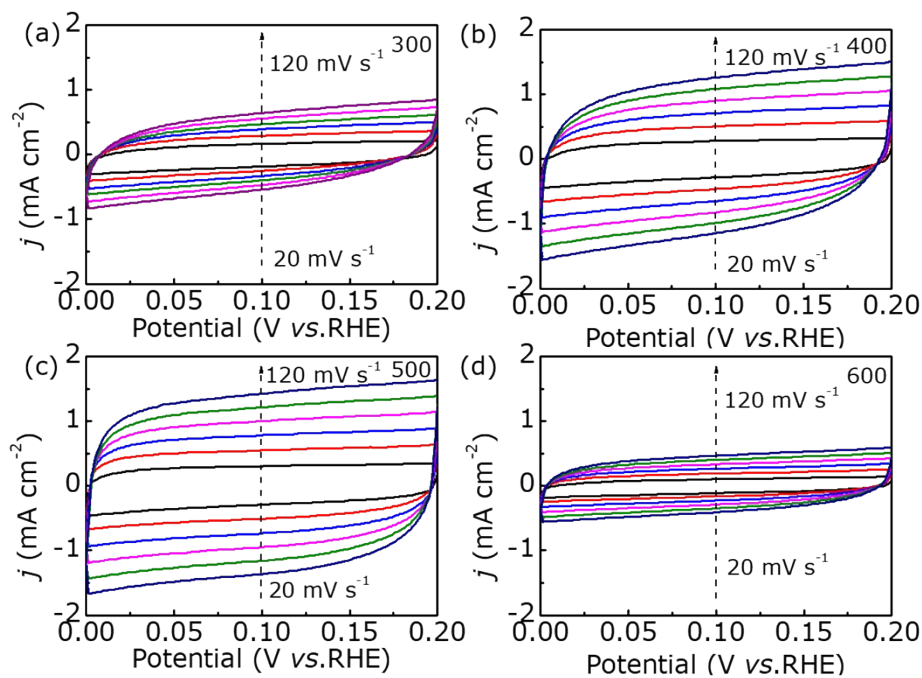

Fig. S2 CV curves of sample(a) 300, (b) 400, (c) 500 and (d) 600.

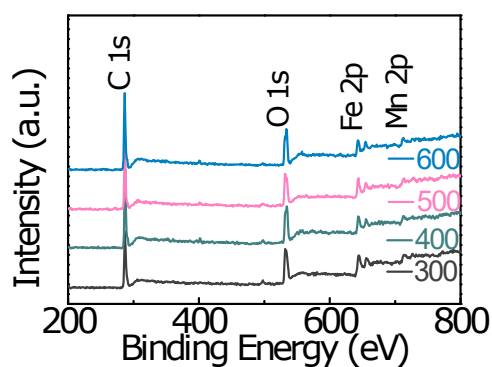

Fig. S3 XPS survey spectrum of the sample 300, 400, 500 and 600

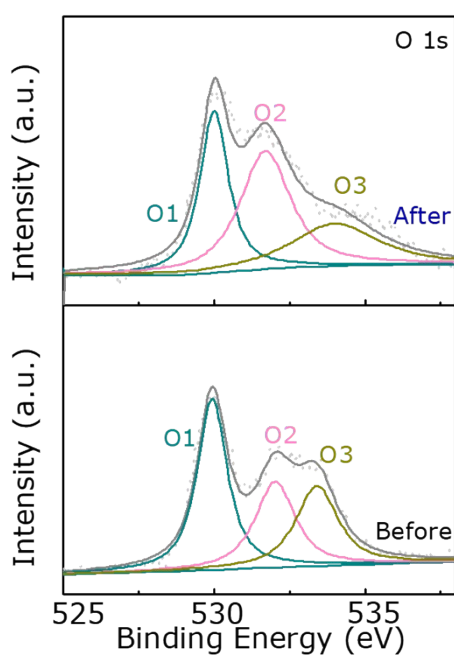

Fig. S4 O 1s spectrum before and after the OER test.

Table S1. Position of Fe 2p component of  $\text{FeMn}_2\text{O}_4$  nanoparticles.

| Peak                    | Species          | B.E.(eV) | Area    |
|-------------------------|------------------|----------|---------|
| 300-Fe2p <sub>3/2</sub> | Fe <sup>2+</sup> | 710.42   | 1200.3  |
|                         | Fe <sup>3+</sup> | 713.16   | 1118.28 |
| 400-Fe2p <sub>3/2</sub> | Fe <sup>2+</sup> | 710.48   | 1259.07 |
|                         | Fe <sup>3+</sup> | 713.18   | 852.25  |
| 500-Fe2p <sub>3/2</sub> | Fe <sup>2+</sup> | 710.62   | 1148.56 |
|                         | Fe <sup>3+</sup> | 713.11   | 794.4   |
| 600-Fe2p <sub>3/2</sub> | Fe <sup>2+</sup> | 710.78   | 1004.26 |
|                         | Fe <sup>3+</sup> | 713.02   | 648.91  |
| 300-Fe2p <sub>1/2</sub> | Fe <sup>2+</sup> | 723.77   | 713.22  |
|                         | Fe <sup>3+</sup> | 726.38   | 640.72  |

|                         |                  |        |        |
|-------------------------|------------------|--------|--------|
| 400-Fe2p <sub>1/2</sub> | Fe <sup>2+</sup> | 724.14 | 628.76 |
|                         | Fe <sup>3+</sup> | 726.39 | 436.44 |
| 500-Fe2p <sub>1/2</sub> | Fe <sup>2+</sup> | 724.22 | 762.86 |
|                         | Fe <sup>3+</sup> | 727.19 | 554.83 |
| 600-Fe2p <sub>1/2</sub> | Fe <sup>2+</sup> | 724.21 | 596.29 |
|                         | Fe <sup>3+</sup> | 724.04 | 502.23 |

Table S2. Position of Mn 2p component of FeMn<sub>2</sub>O<sub>4</sub> nanoparticles.

| Peak                    | Species          | B.E.(eV) | Area    |
|-------------------------|------------------|----------|---------|
| 300-Mn2p <sub>3/2</sub> | Mn <sup>2+</sup> | 641.24   | 1582.91 |
|                         | Mn <sup>3+</sup> | 642.69   | 1834.54 |
|                         | Mn <sup>4+</sup> | 644.82   | 1980.02 |
| 400-Mn2p <sub>3/2</sub> | Mn <sup>2+</sup> | 641.28   | 1944.22 |
|                         | Mn <sup>3+</sup> | 642.54   | 1448.6  |
|                         | Mn <sup>4+</sup> | 644.2    | 1513.82 |
| 500-Mn2p <sub>3/2</sub> | Mn <sup>2+</sup> | 641.29   | 1202.34 |
|                         | Mn <sup>3+</sup> | 642.38   | 1512.2  |
|                         | Mn <sup>4+</sup> | 644.18   | 982.13  |
| 600-Mn2p <sub>3/2</sub> | Mn <sup>2+</sup> | 641.24   | 1574.62 |
|                         | Mn <sup>3+</sup> | 642.55   | 1436.96 |
|                         | Mn <sup>4+</sup> | 644.45   | 946.68  |
| 300-Mn2p <sub>1/2</sub> | Mn <sup>2+</sup> | 652.85   | 616.66  |
|                         | Mn <sup>3+</sup> | 654.35   | 885.8   |
|                         | Mn <sup>4+</sup> | 655.89   | 1485.14 |
| 400-Mn2p <sub>1/2</sub> | Mn <sup>2+</sup> | 652.79   | 998.58  |
|                         | Mn <sup>3+</sup> | 653.92   | 813.66  |
|                         | Mn <sup>4+</sup> | 655.51   | 800.28  |
| 500-Mn2p <sub>1/2</sub> | Mn <sup>2+</sup> | 652.61   | 612.13  |
|                         | Mn <sup>3+</sup> | 653.9    | 752.14  |
|                         | Mn <sup>4+</sup> | 655.62   | 451.24  |
| 600-Mn2p <sub>1/2</sub> | Mn <sup>2+</sup> | 652.62   | 865.98  |
|                         | Mn <sup>3+</sup> | 653.81   | 803.69  |
|                         | Mn <sup>4+</sup> | 655.64   | 658.36  |

Table S3. Position of O 1s component of FeMn<sub>2</sub>O<sub>4</sub> nanoparticles.

| Peak   | B.E.(eV) | Area    |
|--------|----------|---------|
| 300-O1 | 529.72   | 2999.72 |
| 300-O2 | 532.25   | 4447.02 |
| 300-O3 | 533.84   | 2988.86 |
| 400-O1 | 529.75   | 3971.91 |

|        |        |         |
|--------|--------|---------|
| 400-O2 | 532.05 | 4848.13 |
| 400-O3 | 533.39 | 2725.98 |
| 500-O1 | 529.93 | 3941.03 |
| 500-O2 | 532.03 | 2620.55 |
| 500-O3 | 533.4  | 2563.84 |
| 600-O1 | 529.92 | 3703.94 |
| 600-O2 | 532.13 | 4352.68 |
| 600-O3 | 533.43 | 2517.76 |

Table S4. The Mössbauer Parameters: Isomer Shift (IS), Quadrupole Splitting (QS), Average Magnetic Hyperfine Field (H), Width, and Relative Area (Area) Obtained by Spectral Fitting.

| Samples | Subspectrum | IS(mm/s) | QS(mm/s) | H(T)  | Width(mm/s) | Area(%)    |
|---------|-------------|----------|----------|-------|-------------|------------|
|         | D1          | 0.37     | 0.76     |       | 0.47        | 20.9       |
|         | D2          | 0.35     | -7.69    |       | 2.33        | 13.3       |
|         | D3          | 0.37     | 1.58     |       | 0.77        | 10.2       |
|         |             |          |          |       |             | 33.5 (60.4 |
| 500     | M1          | 0.35     | 0.06     | 41.03 | 1.62        | )          |
|         |             |          |          |       |             | 22.0 (39.6 |
|         | M2          | 0.36     | -0.07    | 46.09 | 0.76        | )          |
|         | D1          | 0.31     | 1.15     |       | 0.7         | 15.8       |
|         | D3          | 0.27     | 6.84     |       | 1.77        | 22.1       |
|         |             |          |          |       |             | 30.5 (49.0 |
| 600     | M1          | 0.33     | -0.2     | 50.26 | 0.35        | )          |
|         |             |          |          |       |             | 31.7 (51.0 |
|         | M2          | 0.23     | -0.06    | 39.46 | 2.36        | )          |

Table S5. Comparison of OER catalytic parameters in this work with other catalysts.

| Catalysts               | Electrode potential ( $j=10 \text{ mA cm}^{-2}$ ) | Electrolyte | References |
|-------------------------|---------------------------------------------------|-------------|------------|
| $\text{Mn}_2\text{O}_3$ | 580 mV                                            | 0.1 M KOH   | 1          |
| $\text{Mn}_3\text{O}_4$ | 323 mV                                            | 1 M KOH     | 2          |
| $\text{MnO}_2$          | 570 mV                                            | 0.1 M KOH   | 3          |

|                                  |        |           |           |
|----------------------------------|--------|-----------|-----------|
| CoMn <sub>2</sub> O <sub>4</sub> | 310 mV | 0.1 M KOH | 4         |
| NiFe <sub>2</sub> O <sub>4</sub> | 381 mV | 1 M KOH   | 5         |
| R-Fe <sub>3</sub> O <sub>4</sub> | 320 mV | 1 M KOH   | 6         |
| FeCo <sub>2</sub> O <sub>4</sub> | 393 mV | 1 M KOH   | 7         |
| FeMn <sub>2</sub> O <sub>4</sub> | 360 mV | 1 M KOH   | This work |

## References

1. K.L. Pickrahn, S.W. Park, Y. Gorlin, H.B.R. Lee, T.F. Jaramillo, S.F. Bent, *Adv. Energy. Mater.*, 2012, **2**, 1269-1277.
2. P.C. Nagajyothi, R. Ramaraghavulu, K. Munirathnam, K. Yoo, J. Shim, *Int. J. Hydrogen. Energ.*, 2021, **46**, 13946-13951.
3. J. He, M. Wang, W. Wang, R. Miao, W. Zhong, S.Y. Chen, S. Poges, T. Jafari, W. Song, J. Liu, S.L. Suib, Hierarchical Mesoporous NiO/MnO<sub>2</sub>@PANI Core-Shell Microspheres, *ACS. Appl. Mater. Inter.*, 2017, **9**, 42676-42687.
4. A. Bahadur, W. Hussain, S. Iqbal, F. Ullah, M. Shoaib, G. Liu, K. Feng, *J. Mater. Chem. A.*, 2021, **9**, 12255-12264.
5. V. Maruthapandian, M. Mathankumar, V. Saraswathy, B. Subramanian, S. Muralidharan, *ACS. Appl. Mater. Inter.*, 2017, **9**, 13132-13141.
6. X. Y. Zhang, B. Y. Guo, Z.Y. Lin, B. Dong, Q.W. Chen, Y.W. Dong, M. Yang, L. Wang, C.G. Liu, Y.M. Chai, *Int. J. Hydrogen. Energ.*, 2020, **45**, 15476-15482.
7. A. Kundu, A.I. Robby, A. Shit, H.J. Jo, S.Y. Park, *Mater. (Basel)*, 2020, **13**, 3119.
